# Supplementary material for: An IL-2 mutein increases regulatory T cell suppression of dendritic cells via IL-10 and CTLA-4 to promote T cell anergy
Source: PubMed Central journal article supplement — Cell Rep. 2024 Nov 2;43(11):114938. doi: 10.1016/j.celrep.2024.114938 (PMC11602548; doi:10.1016/j.celrep.2024.114938), 2024-11-02
Supplement: mmc1.pdf [file mmc1.pdf]

**Cell Reports, Volume 43**

**Supplemental information**

**An IL-2 mutein increases regulatory T cell  
suppression of dendritic cells via IL-10  
and CTLA-4 to promote T cell anergy**

**Braxton L. Jamison, Matthew Lawrance, Chun Jing Wang, Hannah A. DeBerg, Lauren J. Ziegler, David M. Sansom, Marc A. Gavin, Lucy S.K. Walker, and Daniel J. Campbell**

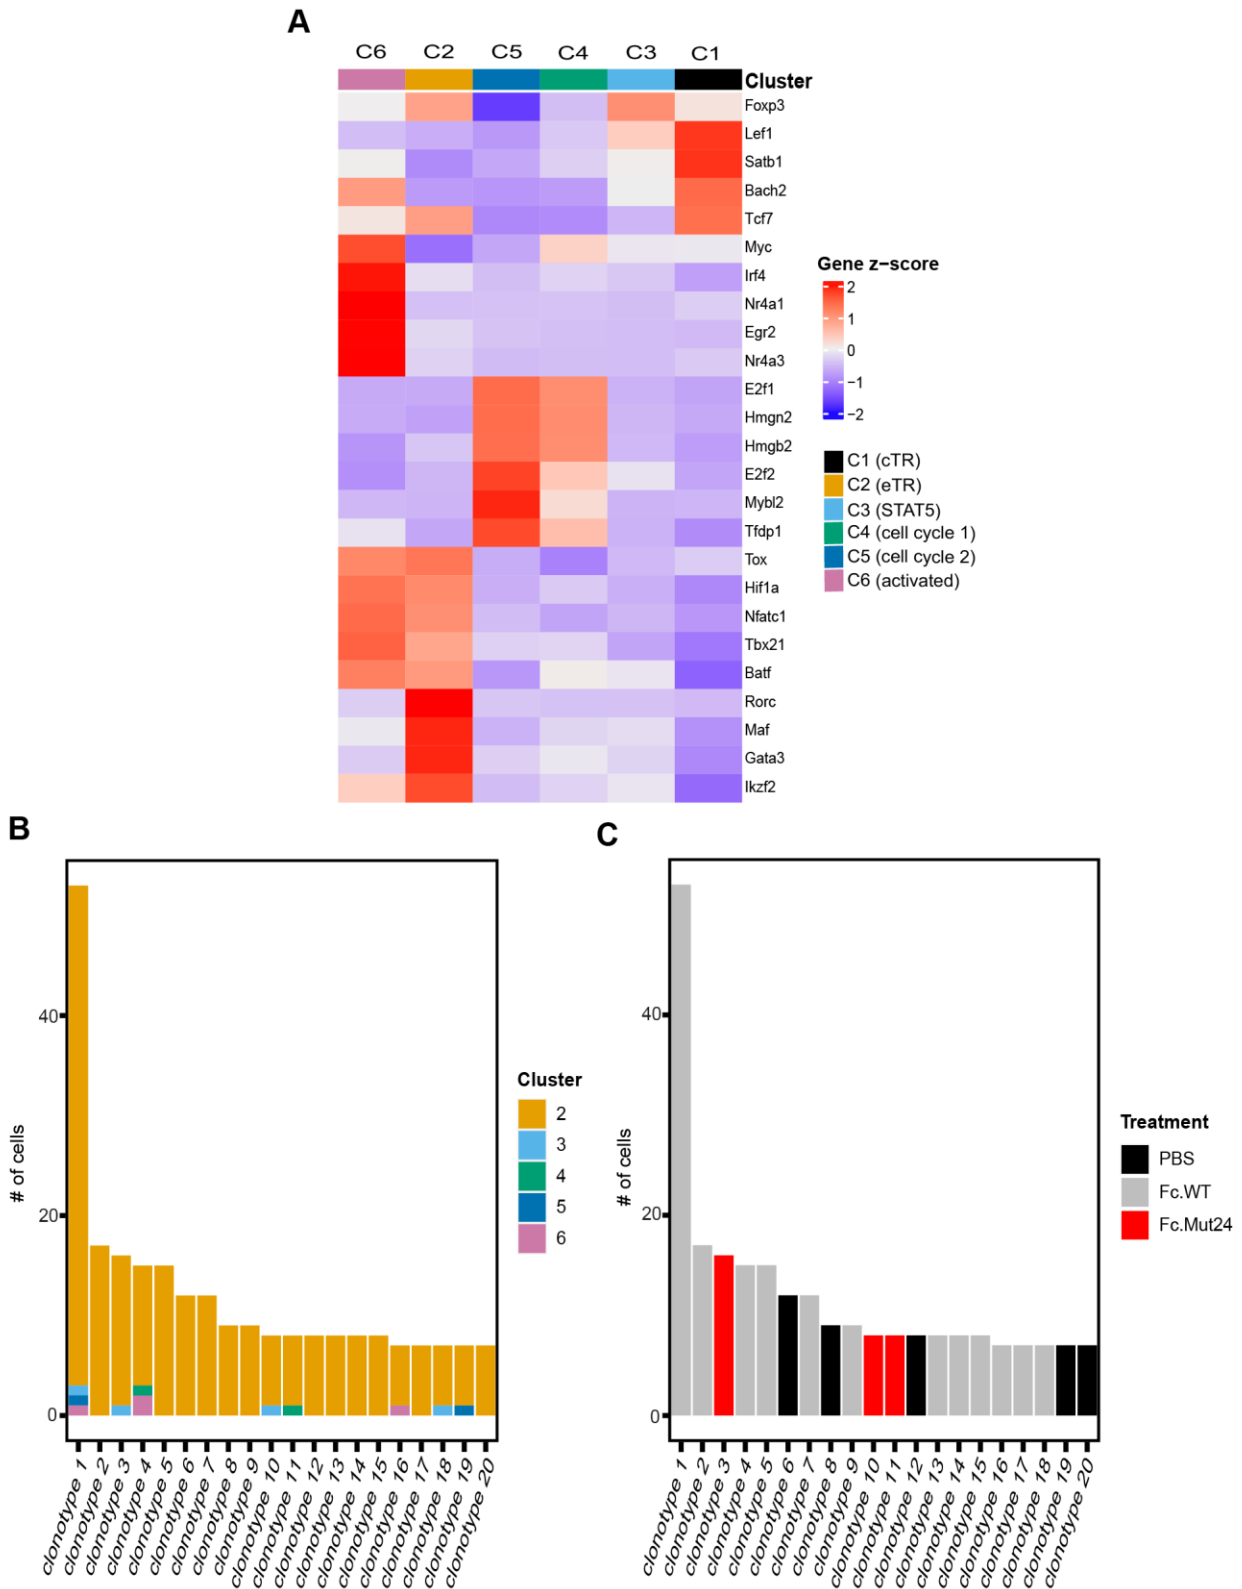

**Figure S1. Fc.Mut24 does not impact Fc $\mu$ 3<sup>+</sup> T<sub>R</sub> cell clonal expansion, related to Figure 1.** Splenocytes from C57BL/6 Fc $\mu$ 3-mRFP treated with PBS, Fc.WT, or Fc.Mut24 were harvested 3 days later and sorted to obtain CD4<sup>+</sup> Fc $\mu$ 3<sup>+</sup> regulatory T (T<sub>R</sub>) cells for single-cell RNA-seq (scRNA-seq). **A.** Heat map showing the mean expression (z-score) of representative transcription factor genes (rows) for each cluster (columns). **B&C.** Bar graphs showing the number of cells identified for each of the top twenty T<sub>R</sub> clonotypes colored by cluster (**B**) or treatment group (**C**).

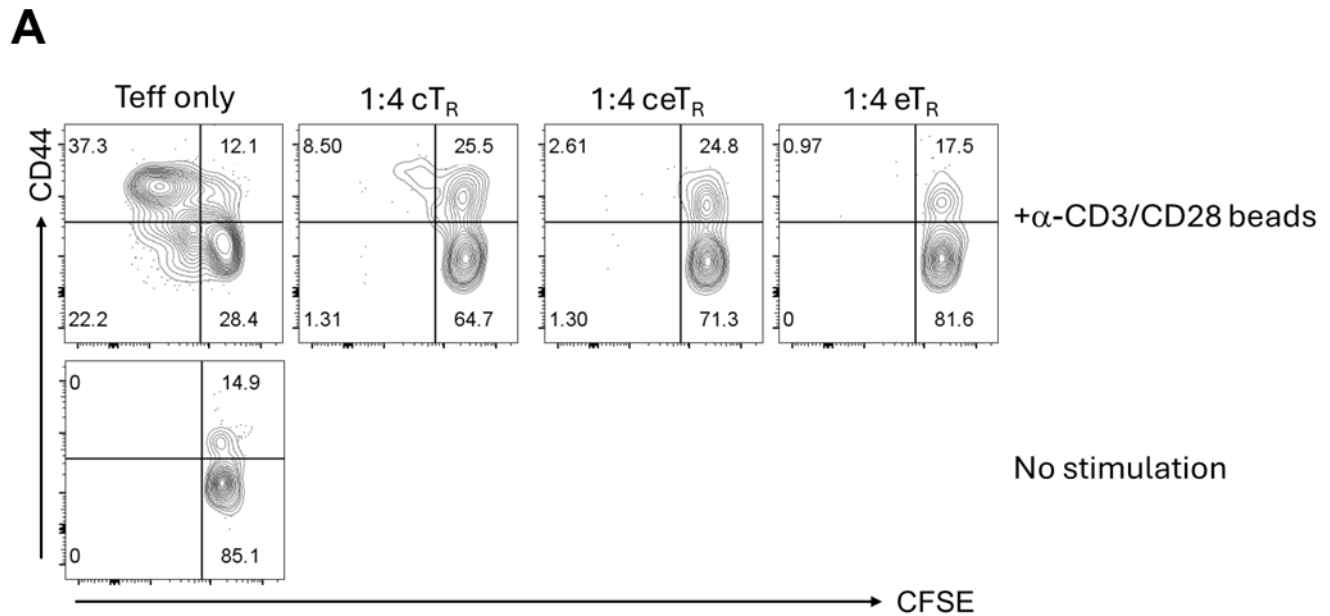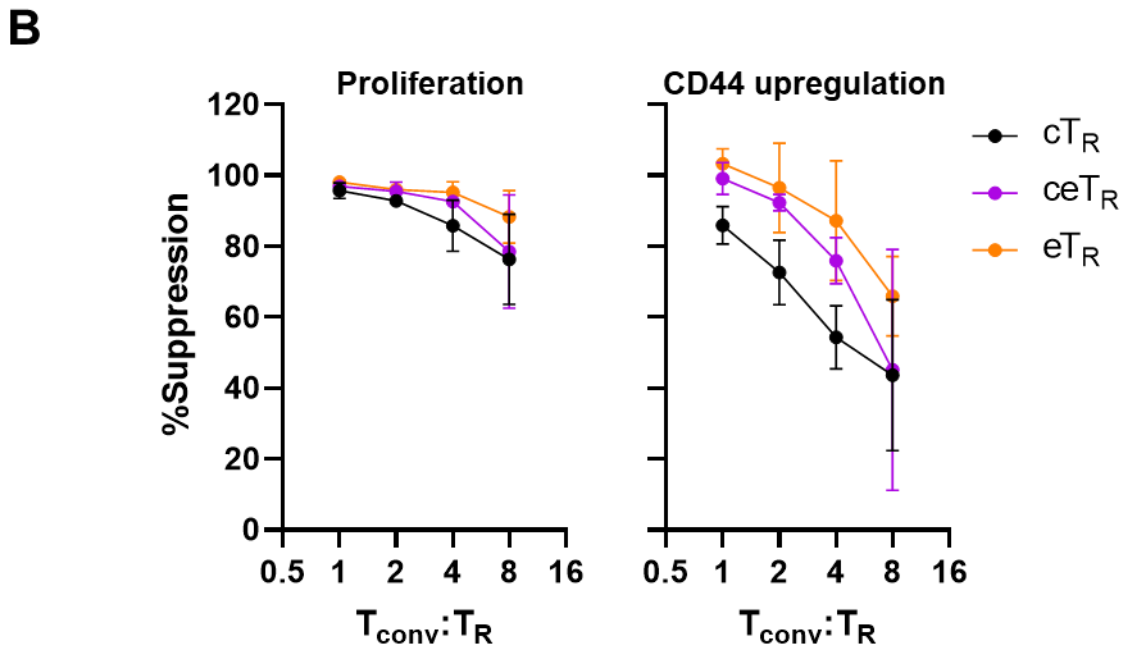

**Figure S2. Fc.Mut24-expanded c<sub>TR</sub>, ce<sub>TR</sub> and e<sub>TR</sub> are highly suppressive, related to Figure 2.** c<sub>TR</sub>, ce<sub>TR</sub> or e<sub>TR</sub> were sorted from the spleens of B6.Foxp3-mRPF mice treated with Fc.Mut24 3 days previously (gated as in Figure 2), and their ability to suppress activation-induced proliferation and upregulation of CD44 by CFSE-labeled and sorted Foxp3-mRFP-negative T<sub>conv</sub> was assessed. **A.** Representative flow cytometric analysis of cell proliferation (based on CFSE-dilution) and CD44 expression by gated Teff cells activated alone or mixed in a 1:4 T<sub>R</sub>:T<sub>conv</sub> ratio with the indicated population of sorted T<sub>R</sub>. **B.** Analysis of %Suppression of T<sub>conv</sub> proliferation and CD44 upregulation by each of the sorted T<sub>R</sub> populations as indicated. No statistical significance was observed in the ability of any of the T<sub>R</sub> populations to suppress either proliferation or CD44 upregulation by one-way ANOVA with Tukey's multiple comparison test.

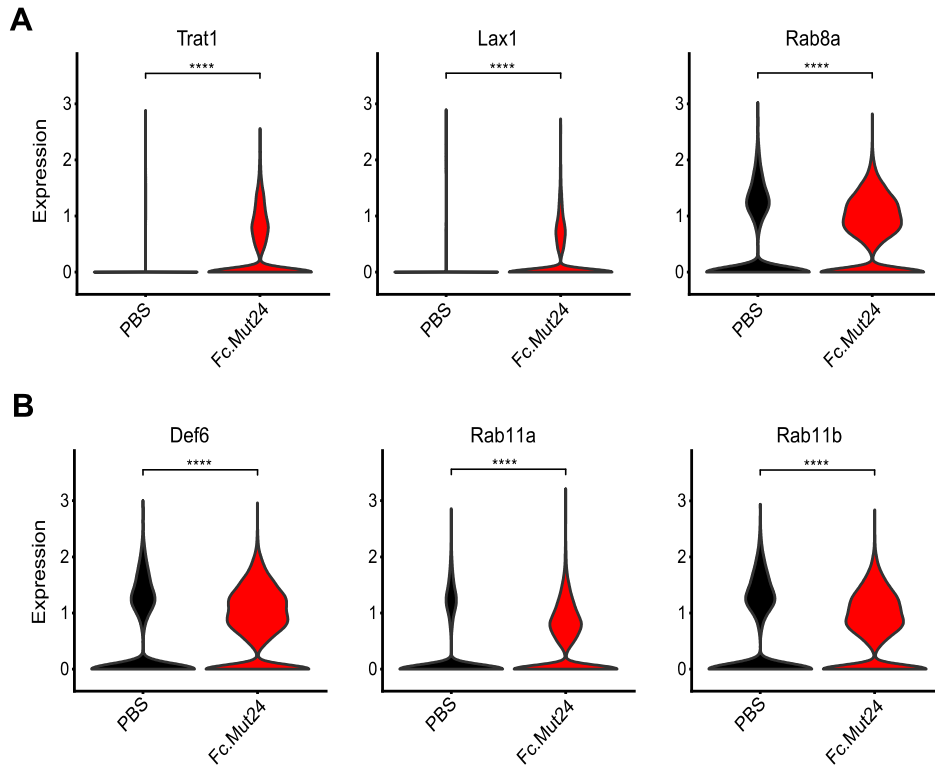

**Figure S3. Fc.Mut24 increases the expression of genes involved in CTLA-4 trafficking and recycling in Foxp3<sup>+</sup> T<sub>R</sub> cells, related to Figure 3.** Splenocytes from C57BL/6 Foxp3-mRFP treated with PBS, Fc.WT, or Fc.Mut24 were harvested 3 days later and sorted to obtain CD4<sup>+</sup> Foxp3<sup>+</sup> regulatory T (T<sub>R</sub>) cells for single-cell RNA-seq (scRNA-seq). Violin plots showing normalized expression for the indicated genes involved in CTLA-4 trafficking to the cell surface **(A)** or endosomal recycling of CTLA-4 **(B)**.

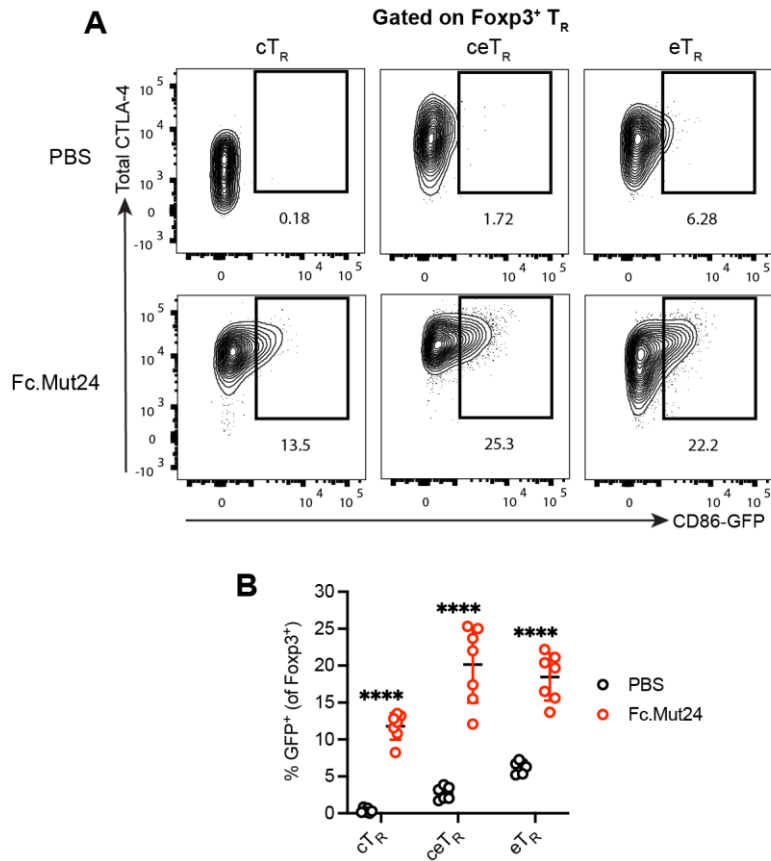

**Figure S4. Fc.Mut24 increases CTLA-4-dependent transendocytosis by different Foxp3<sup>+</sup> T<sub>R</sub> cell populations, related to Figure 4. A.** Capture of CD86-GFP by CD44<sup>lo</sup> CD62L<sup>hi</sup> central T<sub>R</sub> (cT<sub>R</sub>), CD44<sup>hi</sup> CD62L<sup>hi</sup> central effector T<sub>R</sub> (ceT<sub>R</sub>), and CD44<sup>hi</sup> CD62L<sup>lo</sup> effector T<sub>R</sub> (eT<sub>R</sub>) cells between different treatment groups. See Figure 4A for the experimental design schematic. Representative flow cytometry plots are shown. **B.** Graph shows mean  $\pm$  SD with individual data points ( $n = 7$ ); \*\*\*\* $P \leq 0.0001$ , multiple unpaired  $t$ -tests. Data are representative of 2-3 independent experiments.

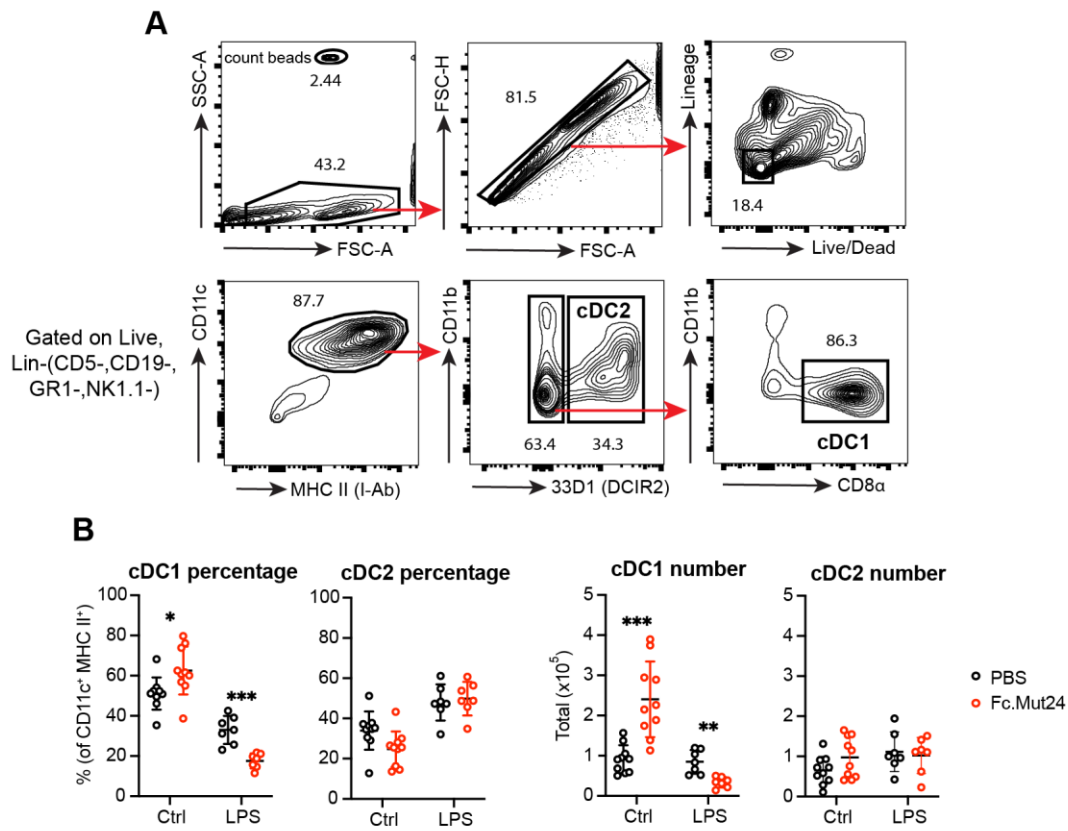

**Figure S5. Fc.Mut24 expands cDC1s in C57BL/6 mice, related to Figure 5. A.** Representative gating strategy for CD11c<sup>+</sup>MHC II<sup>+</sup>33D1<sup>-</sup> CD8α<sup>+</sup> cDC1 and CD11c<sup>+</sup>MHC II<sup>+</sup>33D1<sup>+</sup> cDC2. **B.** Percentage and number of cDC1 and cDC2 between different treatment groups. See Figure 5A for the experimental design schematic. Graphs show mean ± SD with individual data points (n = 7 to 10); \* $P \leq 0.05$ , \*\* $P \leq 0.01$ , \*\*\* $P \leq 0.001$ , multiple unpaired  $t$ -tests. Ctrl, Control. Data are representative of 2-3 independent experiments.

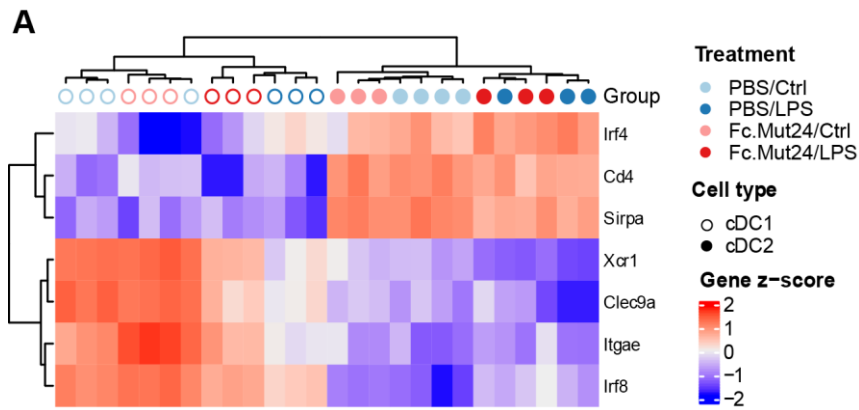

**Figure S6. Expression of known identity markers in dendritic cells after Fc.Mut24 treatment, related to Figure 5.** Unstimulated (Ctrl) or LPS-stimulated splenocytes from C57BL/6 mice treated with PBS or Fc.Mut24 were harvested 4 days post-treatment and sorted to obtain cDC1 or cDC2 populations for bulk RNA-seq. See Figure 5A for the experimental design schematic. **A.** Heatmap showing the mean expression (z-score) of select genes differentially expressed between cDC1 and cDC2 for all treatment groups.

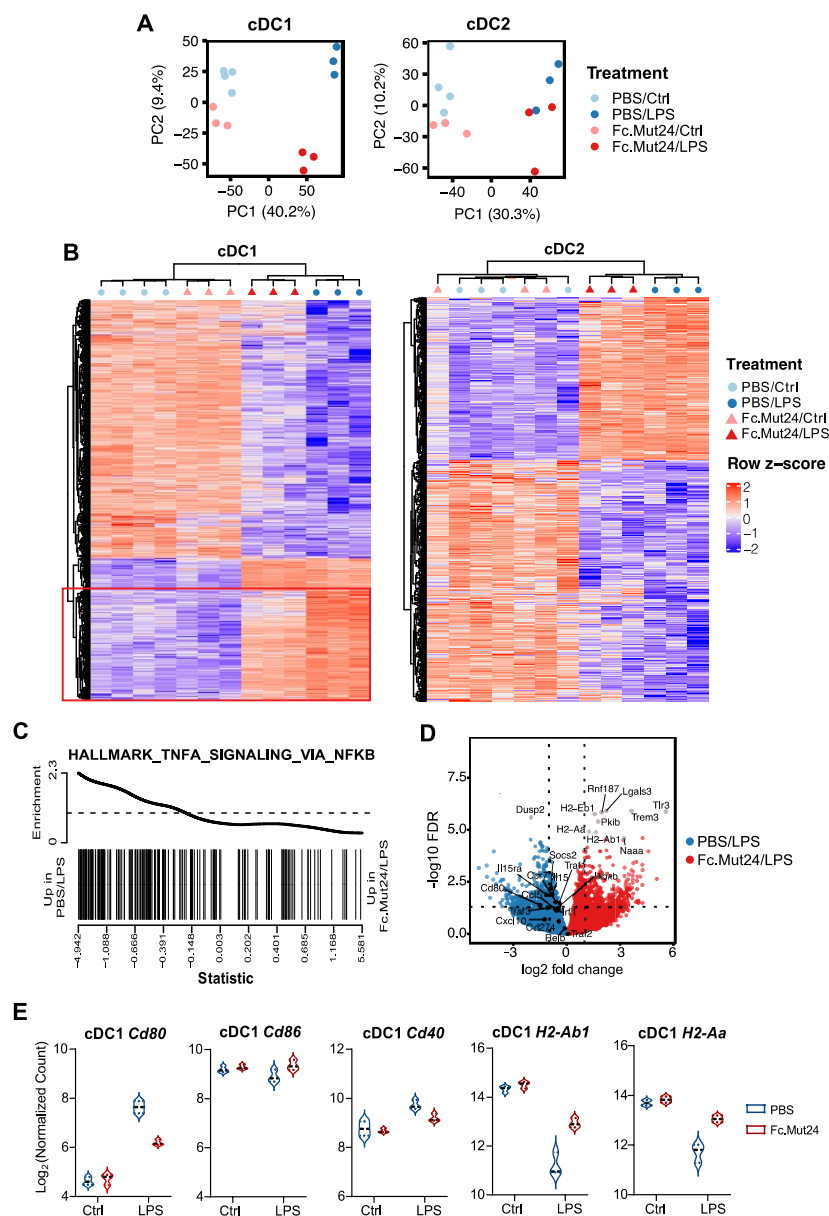

**Figure S7. Impact of Fc.Mut24 treatment of the LPS-mediated transcriptional response in dendritic cells, related to Figure 5.** Unstimulated (Ctrl) or LPS-stimulated splenocytes from C57BL/6 mice treated with PBS or Fc.Mut24 were harvested 4 days post-treatment and sorted to obtain cDC1 or cDC2 populations for bulk RNA-seq. See Figure 5A for the experimental design schematic. **A.** Principal component analysis of global transcriptional signatures from indicated cell types and treatment groups. **B.** Heatmap showing the mean expression (z-score) of all genes differentially expressed between LPS and Ctrl samples in cDC1 and cDC2 (FDR < 0.01,  $\log_2$  fold-change > 1). In cDC1s, a subset of genes (red rectangle) have diminished LPS-mediated upregulation in the presence of Fc.Mut24. **C.** Gene set enrichment analysis of cDC1s showing that the Hallmark TNFA Signaling via NFKB pathway is enriched in PBS/LPS relative to Fc.Mut24/LPS samples (FDR = 0.005). **D.** Volcano plot of cDC1s comparing Fc.Mut24 treatment versus PBS with the top ten differentially expressed genes by FDR (gray) and select NF $\kappa$ B-regulated genes (black) highlighted. **E.** Violin plots of cDC1s showing  $\log_2$  normalized counts for select genes: *Cd80*, *Cd86*, *CD40*, *H2-Ab1* (I-A<sup>b</sup> beta chain), and *H2-Aa* (I-A<sup>b</sup> alpha chain).



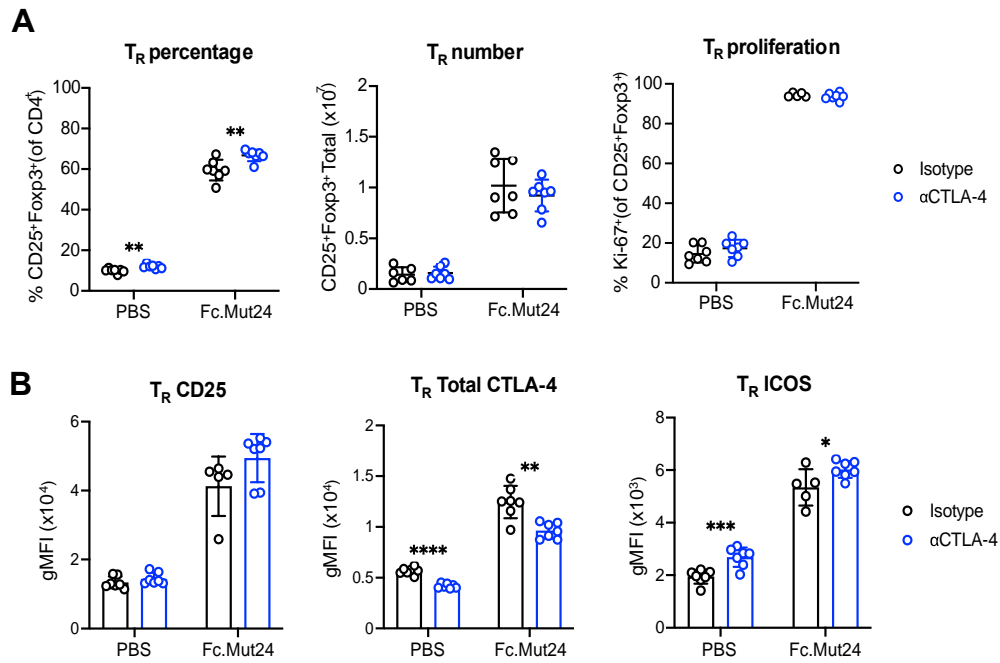

**Figure S8. The anti-CTLA-4 antibody 4F10 does not cause Foxp3<sup>+</sup> T<sub>R</sub> cell depletion during Fc.Mut24 treatment, related to Figure 5.** Splenocytes from C57BL/6 mice treated with PBS or Fc.Mut24 followed by isotype or anti-CTLA-4 antibody and LPS stimulation were analyzed by flow cytometry. Gates were set on live, CD4<sup>+</sup> cells. **A&B.** Graphs show mean ± SD with individual data points (n = 7); \**P* ≤ 0.05, \*\**P* ≤ 0.01, \*\*\**P* ≤ 0.001, \*\*\*\**P* ≤ 0.0001, multiple unpaired *t*-tests. Data are representative of 2-3 independent experiments. **B.** Gates were set on CD25<sup>+</sup> Foxp3<sup>+</sup> T<sub>R</sub> for analysis of the expression of indicated T<sub>R</sub> activation markers.

**A**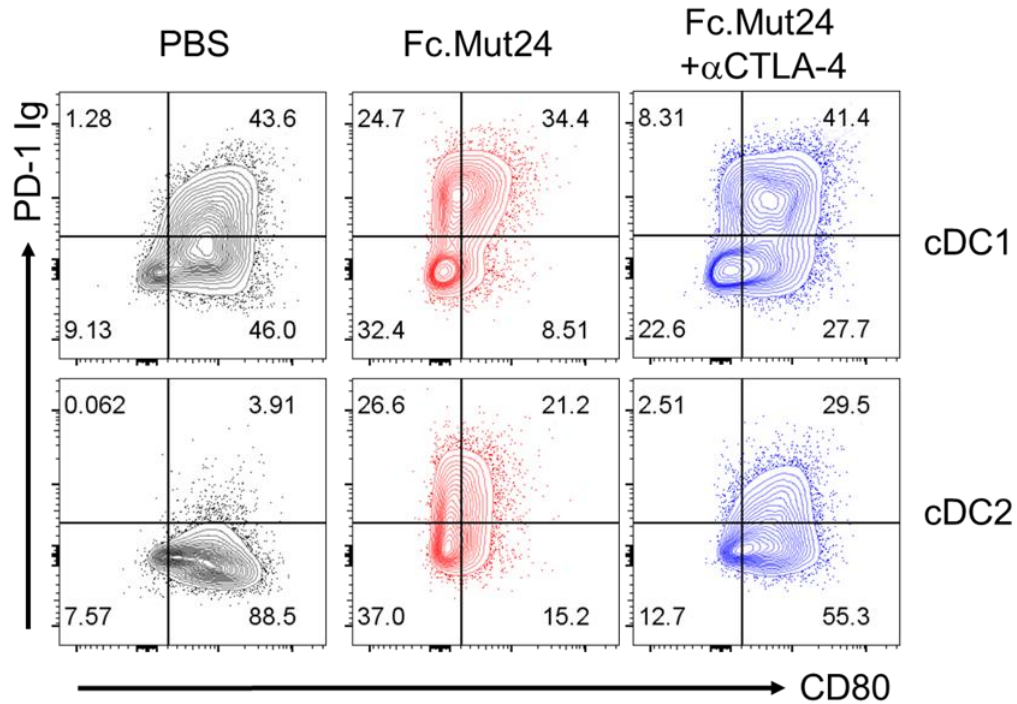**B**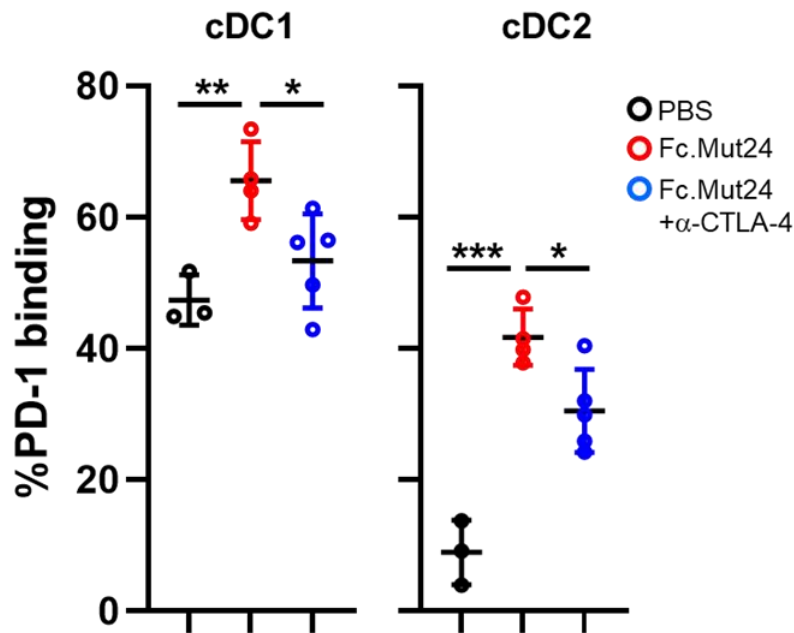

**Figure S9. Fc.Mut24 treatment enhances PD-1 binding to splenic DCs, related to Figure 5.** Splenic DCs (gated as in Fig. S5) from C57BL/6 mice treated with PBS, Fc.Mut24, or Fc.Mut24 + anti-CTLA-4 antibody followed by LPS were analyzed by flow cytometry. **A.** Representative flow cytometry plots showing CD80 expression and PD-1 binding by gated cDC1 and cDC2. **B.** Graphs show mean  $\pm$  SD with individual data points in each group as indicated ( $n = 3-5$  mice/group);  $*P \leq 0.05$ ,  $**P \leq 0.01$ ,  $***P \leq 0.001$ , by one-way ANOVA with Tukey's multiple comparison test. Data are representative of 2 independent experiments.

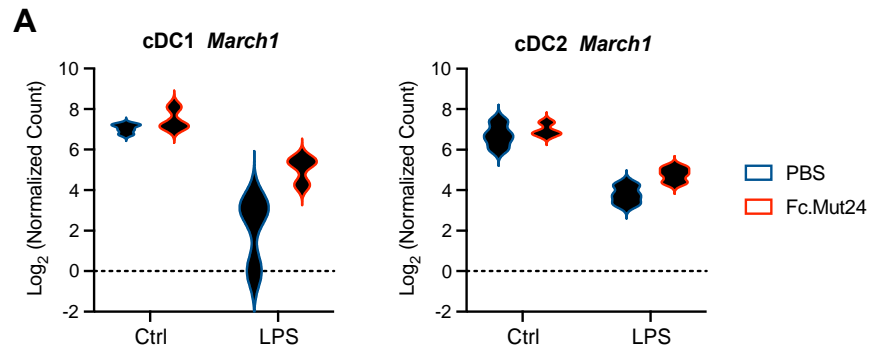

**Figure S10. Fc.Mut24 increases *March1* gene expression in cDC1s from C57BL/6 mice, related to Figure 6.** Unstimulated (Ctrl) or LPS-stimulated splenocytes from C57BL/6 mice treated with PBS or Fc.Mut24 were harvested 4 days post-treatment and sorted to obtain cDC1 or cDC2 populations for bulk RNA-seq. See Figure 5A for the experimental design schematic **A**. Violin plots showing Log<sub>2</sub> normalized counts for *March1* gene expression between treatment groups.

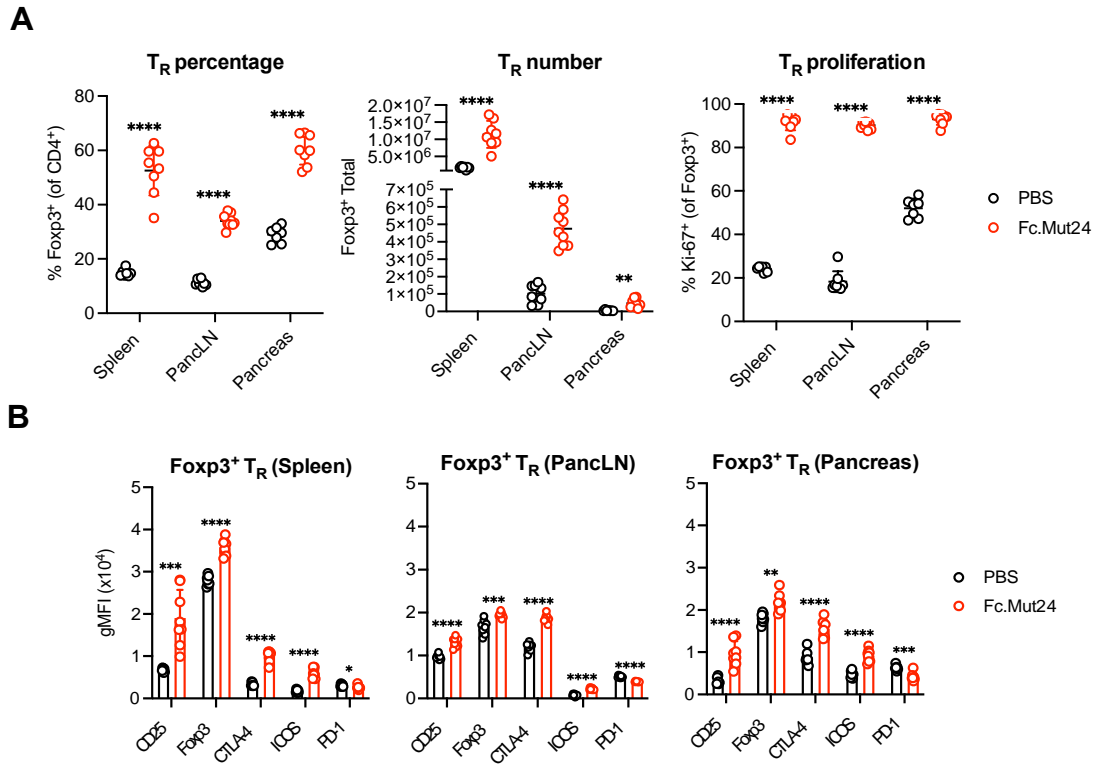

**Figure S11. Fc.Mut24 promotes Foxp3<sup>+</sup> T<sub>R</sub> cell activation in NOD mice, related to Figure 7.** The spleen, pancreatic lymph node (PancLN), and pancreas of 8-10-week-old female non-obese diabetic (NOD) mice treated with PBS or Fc.Mut24 were harvested 4 days later and analyzed by flow cytometry. Gates were set on live, CD45<sup>+</sup>, CD4<sup>+</sup> cells. Percentage, number, and proliferation (Ki-67<sup>+</sup>) of Foxp3<sup>+</sup> T<sub>R</sub> cells **(A)** and expression of indicated T<sub>R</sub> activation markers **(B)**. **A&B.** All graphs show mean  $\pm$  SD with individual data points ( $n = 6$  to  $9$ ); \* $P \leq 0.05$ , \*\* $P \leq 0.01$ , \*\*\* $P \leq 0.001$ , \*\*\*\* $P \leq 0.0001$ , multiple unpaired  $t$ -tests. Data are representative of 2-3 independent experiments.

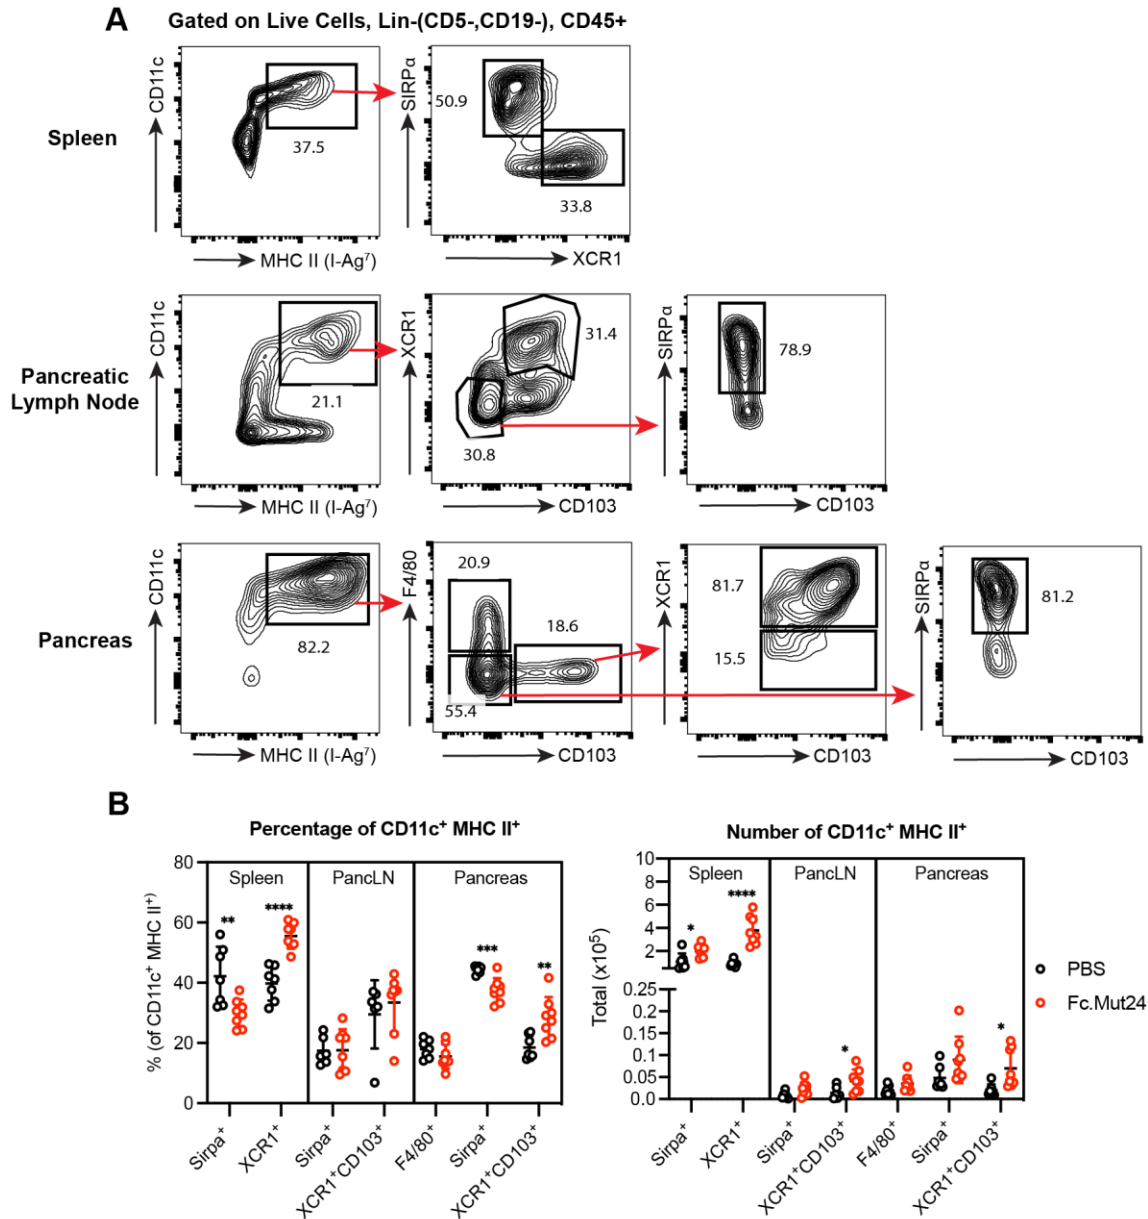

**Figure S12. Fc.Mut24 expands cDC1s in NOD mice, related to Figure 7.** The spleen, pancreas, and pancreatic lymph node (PancLN) of 8-10-week-old female non-obese diabetic (NOD) mice treated with PBS or Fc.Mut24 were harvested 4 days later and analyzed by flow cytometry. **A.** Representative gating strategy for the CD11c<sup>+</sup> MHC II<sup>+</sup> antigen-presenting cell subsets in different tissues. **B.** Percentage and number of different subsets of CD11c<sup>+</sup> MHC II<sup>+</sup> antigen-presenting cells. Graphs show mean  $\pm$  SD with individual data points (n = 6 to 8); \* $P \leq 0.05$ , \*\* $P \leq 0.01$ , \*\*\* $P \leq 0.001$ , \*\*\*\* $P \leq 0.0001$ , multiple unpaired *t*-tests. Data are representative of 2-3 independent experiments.

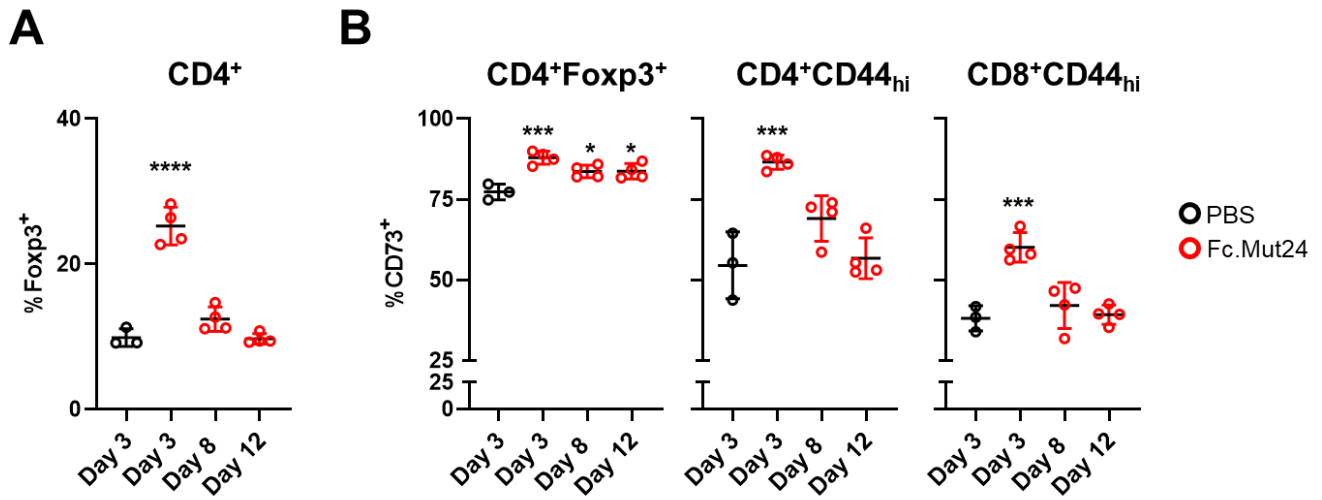

**Figure S13. CD73 expression is transiently upregulated by CD4<sup>+</sup> and CD8<sup>+</sup> effector T cells after Fc.Mut24 treatment of NOD mice, related to Figure 7.** T cells from the pancLN of NOD mice treated with either PBS (black symbols) or Fc.Mut24 (red symbols) were analyzed by flow cytometry. **A.** Frequency of Foxp3<sup>+</sup> T<sub>R</sub> among total CD4<sup>+</sup> T cells at the indicated times after treatment. **B.** Frequency of CD73<sup>+</sup> cells among CD4<sup>+</sup>Foxp3<sup>+</sup>, CD4<sup>+</sup>Foxp3<sup>-</sup>CD44<sup>hi</sup>, and CD8<sup>+</sup>CD44<sup>hi</sup> populations at the indicated times after treatment. \* $P \leq 0.05$ , \*\* $P \leq 0.01$ , \*\*\* $P \leq 0.001$ , \*\*\*\* $P \leq 0.0001$ , one-way ANOVA with Tukey's multiple comparison test. Data are from 1 experiment.
